# Supplementary material
Source: PubMed Central journal article supplement (PMC7783760)
Supplement: ajcr0010-4178-f11.pdf [file ajcr0010-4178-f11.pdf]

*UBE2I* indicates poor prognosis in HCC via ATGs

**Table S1.** Top 100 genes of *UBE2I* co-expression related

| Correlated Gene | Cytoband      | Spearman's Correlation | p-Value  | q-Value  |
|-----------------|---------------|------------------------|----------|----------|
| RNPS1           | 16p13.3       | 0.817                  | 7.98E-91 | 1.60E-86 |
| LCMT1           | 16p12.1       | 0.711                  | 1.16E-58 | 1.16E-54 |
| PCSK6           | 15q26.3       | -0.669                 | 8.60E-50 | 5.76E-46 |
| ALDOA           | 16p11.2       | 0.648                  | 8.80E-46 | 4.42E-42 |
| PPIH            | 1p34.2        | 0.629                  | 1.83E-42 | 7.33E-39 |
| METTL9          | 16p12.2       | 0.627                  | 3.36E-42 | 1.12E-38 |
| CLIC1           | 6p21.33       | 0.617                  | 1.51E-40 | 4.35E-37 |
| PKMYT1          | 16p13.3       | 0.613                  | 8.77E-40 | 2.20E-36 |
| TBC1D10B        | 16p11.2       | 0.611                  | 1.46E-39 | 3.27E-36 |
| DCTN5           | 16p12.2       | 0.608                  | 5.36E-39 | 1.08E-35 |
| CD2BP2          | 16p11.2       | 0.605                  | 1.38E-38 | 2.51E-35 |
| CCDC189         | 16p11.2       | 0.601                  | 5.25E-38 | 8.79E-35 |
| CAT             | 11p13         | -0.601                 | 6.39E-38 | 9.87E-35 |
| PIK3R1          | 5q13.1        | -0.599                 | 1.01E-37 | 1.46E-34 |
| THOC6           | 16p13.3       | 0.599                  | 1.18E-37 | 1.58E-34 |
| PSMC3IP         | 17q21.2       | 0.598                  | 1.54E-37 | 1.93E-34 |
| TUBA1B          | 12q13.12      | 0.596                  | 2.80E-37 | 3.31E-34 |
| FMO4            | 1q24.3        | -0.594                 | 5.29E-37 | 5.90E-34 |
| TEDC2           | 16p13.3       | 0.592                  | 1.29E-36 | 1.37E-33 |
| G6PD            | Xq28          | 0.589                  | 3.87E-36 | 3.89E-33 |
| DMGDH           | 5q14.1        | -0.587                 | 6.62E-36 | 6.33E-33 |
| BOLA2           | 16p11.2       | 0.586                  | 1.04E-35 | 9.48E-33 |
| RPUSD1          | 16p13.3       | 0.584                  | 1.91E-35 | 1.67E-32 |
| SLC6A1          | 3p25.3        | -0.583                 | 2.42E-35 | 2.03E-32 |
| FKBP1A          | 20p13         | 0.581                  | 5.33E-35 | 4.28E-32 |
| ALDH5A1         | 6p22.3        | -0.579                 | 9.30E-35 | 7.18E-32 |
| SNRPA           | 19q13.2       | 0.578                  | 1.13E-34 | 8.39E-32 |
| NUDT1           | 7p22.3        | 0.578                  | 1.39E-34 | 9.98E-32 |
| VASP            | 19q13.32      | 0.577                  | 1.47E-34 | 1.02E-31 |
| ABCA6           | 17q24.2-q24.3 | -0.577                 | 1.63E-34 | 1.09E-31 |
| KIF2C           | 1p34.1        | 0.575                  | 2.92E-34 | 1.89E-31 |
| RALY            | 20q11.22      | 0.575                  | 3.20E-34 | 2.01E-31 |
| GLYATL1         | 11q12.1       | -0.574                 | 4.99E-34 | 3.04E-31 |
| POLR3K          | 16p13.3       | 0.573                  | 6.28E-34 | 3.71E-31 |
| CEP89           | 19q13.11      | 0.572                  | 8.84E-34 | 5.07E-31 |
| APOB            | 2p24.1        | -0.571                 | 1.29E-33 | 7.22E-31 |
| ZNF213          | 16p13.3       | 0.571                  | 1.34E-33 | 7.28E-31 |
| GPLD1           | 6p22.3        | -0.57                  | 1.70E-33 | 9.00E-31 |
| SLC2A2          | 3q26.2        | -0.569                 | 1.96E-33 | 1.01E-30 |
| JPT1            | 17q25.1       | 0.569                  | 2.01E-33 | 1.01E-30 |
| PI4K2B          | 4p15.2        | -0.569                 | 2.50E-33 | 1.20E-30 |
| MAPRE1          | 20q11.21      | 0.569                  | 2.56E-33 | 1.20E-30 |
| SNRPD1          | 18q11.2       | 0.569                  | 2.58E-33 | 1.20E-30 |
| SEPSECS         | 4p15.2        | -0.568                 | 2.90E-33 | 1.30E-30 |
| RCC2            | 1p36.13       | 0.568                  | 2.95E-33 | 1.30E-30 |
| MIA2            | 14q21.1       | -0.568                 | 2.98E-33 | 1.30E-30 |
| FUS             | 16p11.2       | 0.567                  | 3.94E-33 | 1.67E-30 |
| KHDRBS1         | 1p35.2        | 0.567                  | 4.07E-33 | 1.67E-30 |
| CORO7           | 16p13.3       | 0.567                  | 4.07E-33 | 1.67E-30 |

*UBE2I* indicates poor prognosis in HCC via ATGs

|         |               |        |          |          |
|---------|---------------|--------|----------|----------|
| CYP4A22 | 1p33          | -0.567 | 4.57E-33 | 1.84E-30 |
| TLCD4   | 1p21.3        | -0.566 | 4.89E-33 | 1.93E-30 |
| UPB1    | 22q11.23      | -0.565 | 7.68E-33 | 2.97E-30 |
| RORA    | 15q22.2       | -0.565 | 8.07E-33 | 3.06E-30 |
| TACC3   | 4p16.3        | 0.565  | 8.64E-33 | 3.21E-30 |
| EHHADH  | 3q27.2        | -0.565 | 8.80E-33 | 3.21E-30 |
| SLC10A1 | 14q24.1       | -0.564 | 9.17E-33 | 3.29E-30 |
| ORC6    | 16q11.2       | 0.564  | 1.11E-32 | 3.90E-30 |
| MPDZ    | 9p23          | -0.563 | 1.63E-32 | 5.63E-30 |
| CDC20   | 1p34.2        | 0.562  | 2.17E-32 | 7.38E-30 |
| GIT1    | 17q11.2       | 0.561  | 2.89E-32 | 9.69E-30 |
| RPS2    | 16p13.3       | 0.56   | 3.53E-32 | 1.16E-29 |
| TMSB10  | 2p11.2        | 0.56   | 3.57E-32 | 1.16E-29 |
| ACD     | 16q22.1       | 0.56   | 4.02E-32 | 1.28E-29 |
| RMDN2   | 2p22.2        | -0.559 | 5.47E-32 | 1.72E-29 |
| DNASE1  | 16p13.3       | 0.557  | 9.17E-32 | 2.83E-29 |
| PHF19   | 9q33.2        | 0.556  | 1.14E-31 | 3.48E-29 |
| SLC9B2  | 4q24          | -0.556 | 1.16E-31 | 3.49E-29 |
| METTL7A | 12q13.12      | -0.556 | 1.19E-31 | 3.51E-29 |
| KNOP1   | 16p12.3       | 0.556  | 1.30E-31 | 3.80E-29 |
| EME1    | 17q21.33      | 0.555  | 1.44E-31 | 4.14E-29 |
| CERS5   | 12q13.12      | 0.555  | 1.50E-31 | 4.24E-29 |
| LUC7L   | 16p13.3       | 0.554  | 2.05E-31 | 5.73E-29 |
| STX4    | 16p11.2       | 0.553  | 3.37E-31 | 9.27E-29 |
| AXIN1   | 16p13.3       | 0.552  | 3.98E-31 | 1.08E-28 |
| SNRPD2  | 19q13.32      | 0.552  | 4.18E-31 | 1.12E-28 |
| PCK2    | 14q11.2-q12   | -0.551 | 4.88E-31 | 1.29E-28 |
| SC5D    | 11q23.3-q24.1 | -0.55  | 6.98E-31 | 1.82E-28 |
| DAZAP1  | 19p13.3       | 0.55   | 7.83E-31 | 2.02E-28 |
| MTFR2   | 6q23.3        | 0.549  | 9.86E-31 | 2.49E-28 |
| SFPQ    | 1p34.3        | 0.549  | 9.93E-31 | 2.49E-28 |
| GYS2    | 12p12.1       | -0.549 | 1.04E-30 | 2.59E-28 |
| FMO3    | 1q24.3        | -0.549 | 1.06E-30 | 2.60E-28 |
| COL18A1 | 21q22.3       | -0.548 | 1.12E-30 | 2.70E-28 |
| PGP     | 16p13.3       | 0.548  | 1.17E-30 | 2.79E-28 |
| IFI27L2 | 14q32.12      | 0.548  | 1.43E-30 | 3.39E-28 |
| H2AFZ   | 4q23          | 0.547  | 1.64E-30 | 3.82E-28 |
| HSD17B4 | 5q23.1        | -0.547 | 1.84E-30 | 4.26E-28 |
| HSD17B6 | 12q13.3       | -0.547 | 1.91E-30 | 4.36E-28 |
| MYO1B   | 2q32.3        | -0.546 | 2.36E-30 | 5.30E-28 |
| PKM     | 15q23         | 0.546  | 2.37E-30 | 5.30E-28 |
| MFSD10  | 4p16.3        | 0.545  | 2.92E-30 | 6.45E-28 |
| BIRC5   | 17q25.3       | 0.545  | 3.40E-30 | 7.43E-28 |
| H2AFX   | 11q23.3       | 0.544  | 3.57E-30 | 7.70E-28 |
| ZNF580  | 19q13.42      | 0.544  | 3.73E-30 | 7.97E-28 |
| GATM    | 15q21.1       | -0.544 | 4.63E-30 | 9.79E-28 |
| IQGAP2  | 5q13.3        | -0.543 | 5.57E-30 | 1.16E-27 |
| RMI2    | 16p13.13      | 0.543  | 6.21E-30 | 1.29E-27 |
| NAP1L1  | 12q21.2       | 0.542  | 7.78E-30 | 1.60E-27 |
| MAT1A   | 10q22.3       | -0.542 | 8.18E-30 | 1.66E-27 |
| CCNF    | 16p13.3       | 0.541  | 9.42E-30 | 1.89E-27 |

*UBE2I* indicates poor prognosis in HCC via ATGs

**Table S2.** Differentially-expressed genes of HCCM cell

|           |          |
|-----------|----------|
| DHRS2     | MACF1    |
| PCDH1     | EIF5B    |
| GANAB     | IER3     |
| CYP2S1    | AKR1B1   |
| PCNX3     | MGAT4B   |
| ABLIM3    | SRSF11   |
| SUMO3     | IQGAP1   |
| IGFL2-AS1 | DIO2     |
| PIP5K1A   | LUC7L3   |
| HSP90AA1  | ATP11C   |
| MT2A      | P3H2     |
| ETV4      | ZC3H13   |
| COL16A1   | PNN      |
| KRT80     | SLC7A11  |
| ITPR1     | MKI67    |
| TSPAN14   | FAM78A   |
| SERPINE2  | BCL2L1   |
| NIPA1     | DCLK1    |
| TGFB1     | DICER1   |
| C9orf3    | VOPP1    |
| NUFIP2    | AMTN     |
| SMG1      | FTH1     |
| DSP       | MALAT1   |
| SERPINH1  | PLXND1   |
| BTBD3     | MKNK2    |
| MT1E      | AHCTF1   |
| DACT1     | TAF1     |
| USP9X     | PDE4D    |
| SPINK6    | NT5E     |
| SLC38A1   | SUN2     |
| EPRS      | H19      |
| TUBA1A    | STC2     |
| USP34     | THOC2    |
| FAM208B   | QSER1    |
| ADAM15    | CLSTN1   |
| EIF3A     | PDE2A    |
| NEURL1B   | TAF2     |
| CHD9      | ZMYM4    |
| DYNLT1    | SREBF2   |
| EMP1      | MT-TN    |
| TPM4      | TTC37    |
| TEAD1     | ANKRD17  |
| GPRC5A    | CALM3    |
| ATP6V1A   | CKAP5    |
| CSNK1G1   | LIFR     |
| PEA15     | SERPINE1 |
| ITGA3     | C6orf62  |
| KDELC2    | TOPBP1   |
|           | LPP      |
|           | CD82     |
